# Supplementary material for: Exciton migration and charge transfer in chemically linked P3HT–TiO2nanorod composite
Source: Royal Society of Chemistry journal article supplement (doi:10.1039/c1ra00739d), 2011-11-23

Supporting Information

**Exciton Migration and Charge Transfer in Chemically Linked P3HT-TiO<sub>2</sub> Nanorod  
Composite**

*Tingting Xu,<sup>a</sup> Ming Yan,<sup>a</sup> James D. Hoefelmeyer,<sup>b</sup> and Qiquan Qiao<sup>\*,a</sup>*

a. Center for Advanced Photovoltaics, Department of Electrical Engineering, South Dakota State University, Brookings, SD, 57006, USA.

b. Department of Chemistry, University of South Dakota, Vermillion, SD, 57069, USA.

**To whom correspondence should be addressed. E-mail: [qiquan.qiao@sdstate.edu](mailto:qiquan.qiao@sdstate.edu)**

**Figure S1.** The transmission electron microscopy (TEM) images of anatase TiO<sub>2</sub> nanorods (a) scale bar 20 nm; (b) scale bar 50 nm; (c) selected-area electron diffraction (SAED) pattern. Selected-area electron diffraction (SAED) pattern, in which the d spacing values of these ring patterns are 3.57 Å, 2.37 Å, 1.91 Å, 1.68 Å and 1.47 Å from the inner to outside. They are indexed for (101), (004), (200), (211) or (105), (204) of the TiO<sub>2</sub> anatase phase.

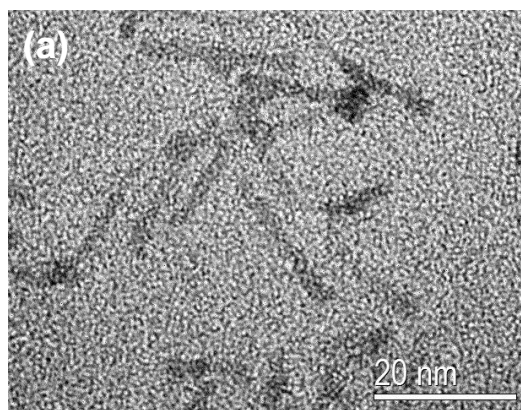

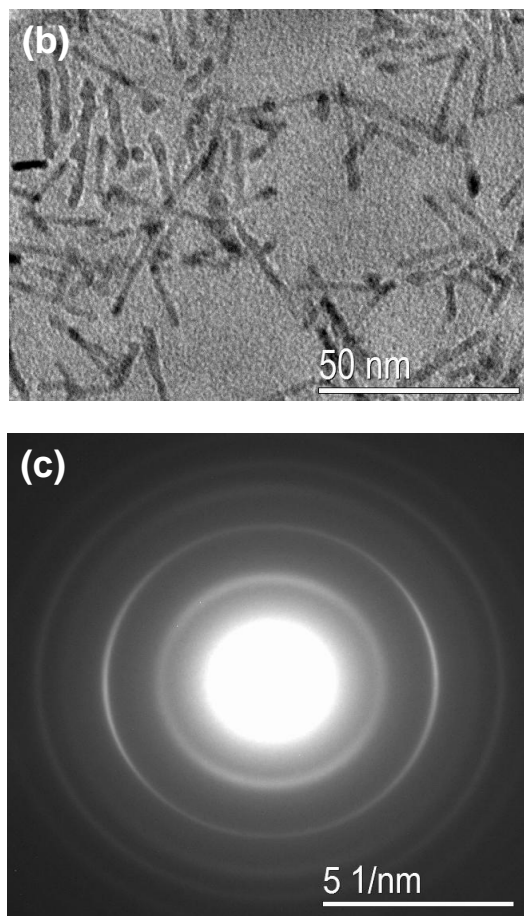

**Figure S2.**  $^1\text{H}$  NMR spectrum (in  $\text{CDCl}_3$ ) of 3-hexylthiophene and regiorandom P3HT prepared in  $\text{CHCl}_3$  solution.

(a) 3-hexylthiophene

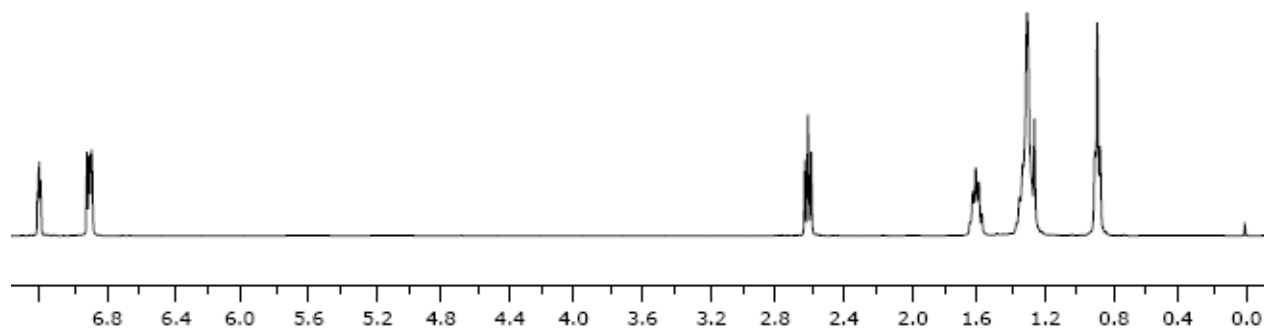

(b) P3HT

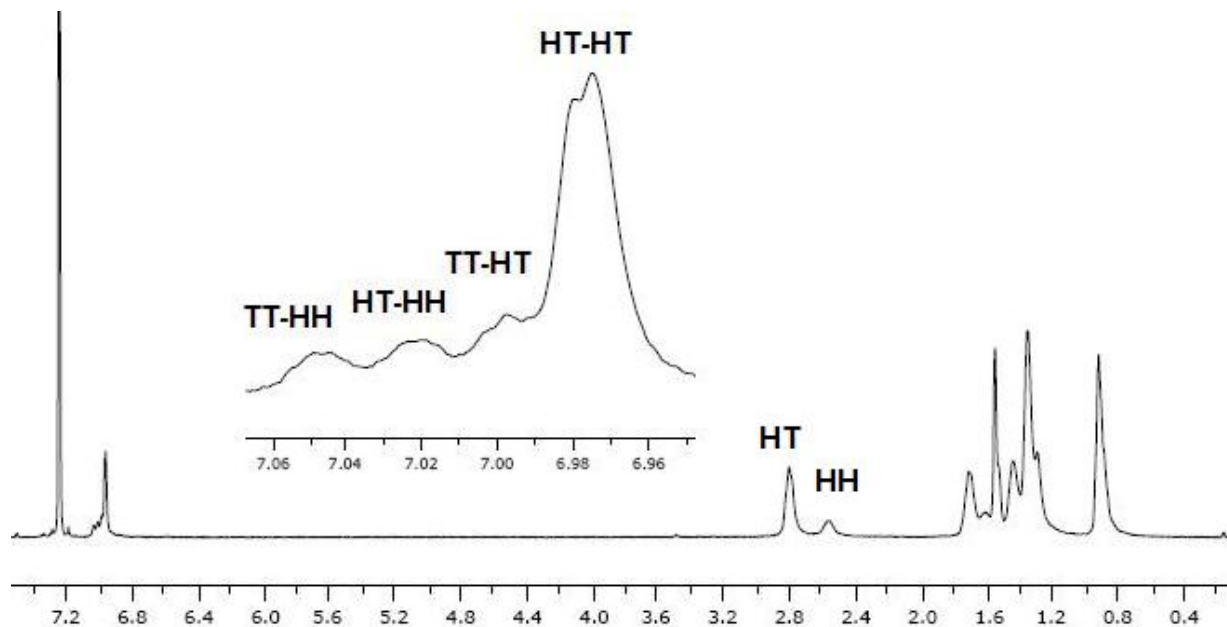

**Figure S3.** Gel permeation chromatography (GPC) analysis of P3HT formed in the FeCl<sub>3</sub> chemical oxidized method. (Regiorandom P3HT, M<sub>n</sub>=55156, PDI=3.22).

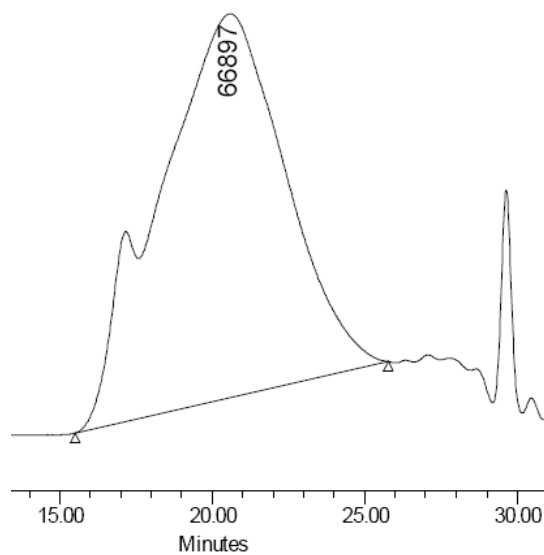

**Figure S4.** The thermogravimetric analysis (TGA) of pristine P3HT (dark) and P3HT-Si-nr-TiO<sub>2</sub> composite (blue). Due to the inclusion of nr-TiO<sub>2</sub> in the chemically linked samples, the weight loss is much lower than that of the pristine P3HT.

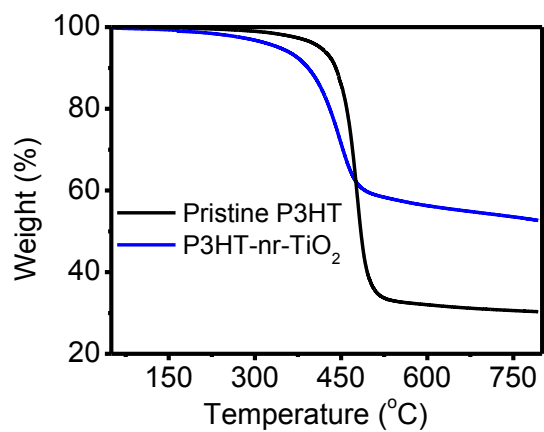

Supplement: c1ra00739d.pdf [file c1ra00739d.pdf]
